# Supplementary material
Source: publisher figshare collection journal article supplement (https://asha.figshare.com/articles/dataset/_/14963616)
Supplement: Supplementary file 1 [file 1]

**Supplemental Table 3.** Descriptive statistics for absolute pupil diameter (PD) according to word difficulty and group.

| Participants | Condition | Mean absolute PD |       |
|--------------|-----------|------------------|-------|
| Controls     | Easy      | <i>n</i>         | 40    |
|              |           | <i>M</i>         | 2.798 |
|              |           | <i>SD</i>        | 0.354 |
|              | Difficult | <i>n</i>         | 40    |
|              |           | <i>M</i>         | 2.834 |
|              |           | <i>SD</i>        | 0.357 |
| PWA          | Easy      | <i>n</i>         | 39    |
|              |           | <i>M</i>         | 2.860 |
|              |           | <i>SD</i>        | 0.406 |
|              | Difficult | <i>n</i>         | 39    |
|              |           | <i>M</i>         | 2.898 |
|              |           | <i>SD</i>        | 0.423 |

*Note.* PWA = people with aphasia.
