# Supplementary material
Source: publisher figshare collection journal article supplement (https://asha.figshare.com/articles/dataset/_/14963616)
Supplement: Supplementary file 2 [file 1]

**Supplemental Table 4.** Mixed-model factorial analysis of variance (ANOVA) on absolute pupil diameter according to word difficulty and group.

| Measure      | Source                    | <i>df</i> | <i>MS</i> | <i>F</i> | <i>p</i> | $\eta^2$ |
|--------------|---------------------------|-----------|-----------|----------|----------|----------|
| Mean<br>TERP | Group                     | 1, 77     | 0.157     | 0.529    | .47      | .007     |
|              | Difficulty                | 1, 77     | 0.054     | 56.890   | .000**   | .425     |
|              | Difficulty $\times$ Group | 1, 77     | 0.000     | 0.043    | .837     | .001     |

*Note.* TERP = task-evoked response of the pupil.

\*\* $p < .01$ , one-tailed ( $\alpha = .025$  with Bonferroni correction).
