# Supplementary material
Source: publisher figshare collection journal article supplement (https://asha.figshare.com/articles/dataset/_/14963616)
Supplement: Supplementary file 3 [file 1]

**Supplemental Table 1.** Summary of demographic, neurological, and language testing information for people with aphasia (PWA).

| #  | A  | G | Ed.  | MPO | Number<br>of CVAs | Aphasia<br>type        | Aphasia<br>severity | Neuroimaging information                                           | WAB-R scores |      |
|----|----|---|------|-----|-------------------|------------------------|---------------------|--------------------------------------------------------------------|--------------|------|
|    |    |   |      |     |                   |                        |                     |                                                                    | AC           | AQ   |
| 1  | 61 | M | 20   | 305 | 1                 | Conduction             | Moderate            | L MCA aneurysm;<br>frontotemporal craniotomy                       | 8.4          | 70.6 |
| 3  | 57 | M | 19   | 76  | 1                 | Anomic                 | Mild                | L MCA; infarct in caudate<br>nucleus                               | 9.5          | 91.8 |
| 4  | 49 | M | 12   | 396 | 1                 | Anomic                 | Mild                | —                                                                  | 9.6          | 93.6 |
| 5  | 65 | F | 16   | 73  | 1                 | Conduction             | Moderate            | —                                                                  | 7.7          | 63.2 |
| 6  | 48 | F | 16   | 77  | 1                 | Broca's                | Moderate            | L                                                                  | 9.7          | 73.8 |
| 7  | 56 | M | 18.5 | 65  | 1                 | Anomic                 | Mild                | L frontal (following blocked<br>carotid)                           | 9.85         | 85.3 |
| 8  | 67 | M | 17.5 | 5   | 1                 | Anomic                 | Mild                | L MCA infarct; infarct in L<br>basal ganglia and corona<br>radiata | 9.5          | 84.6 |
| 9  | 72 | M | 20   | 96  | 1                 | Anomic                 | Mild                | L (following carotid artery<br>endarterectomy)                     | 9.6          | 95.2 |
| 10 | 35 | F | 16   | 53  | 1                 | Anomic                 | Mild                | L temporal, occipital, posterior<br>parietal                       | 8.6          | 81.4 |
| 11 | 59 | M | 19.5 | 13  | 1                 | Broca's                | Severe              | L temporal (following<br>hemorrhage)                               | 5.1          | 25.2 |
| 12 | 43 | M | 16   | 51  | 1                 | Broca's                | Moderate            | L frontal, temporal (following<br>hemorrhage)                      | 7.6          | 64.4 |
| 13 | 48 | M | 20   | 65  | 1                 | Broca's/<br>TransMotor | Mild                | L MCA infarct                                                      | 9.85         | 76.3 |
| 14 | 38 | M | 12   | 15  | 1                 | Broca's                | Moderate            | L                                                                  | 9.4          | 57.6 |
| 15 | 59 | M | 19   | 49  | 1                 | Anomic                 | Mild                | —                                                                  | 9.9          | 94.6 |
| 16 | 70 | M | 20   | 49  | 1                 | Anomic                 | Mild                | L temporoparietal; ischemic<br>CVA (following joint                | 9.9          | 99   |

| #  | A  | G | Ed.  | MPO | Number<br>of CVAs | Aphasia<br>type       | Aphasia<br>severity | Neuroimaging information                                                               | WAB-R scores |      |
|----|----|---|------|-----|-------------------|-----------------------|---------------------|----------------------------------------------------------------------------------------|--------------|------|
|    |    |   |      |     |                   |                       |                     |                                                                                        | AC           | AQ   |
| 17 | 65 | M | 19   | 70  | 1                 | Conduction/<br>Anomic | Mild                | replacement surgery)<br>L frontal ischemic CVA                                         | 7.65         | 77.5 |
| 18 | 47 | F | 16   | 53  | 1                 | Anomic                | Moderate            | —                                                                                      | 7.95         | 75.3 |
| 19 | 51 | F | 12   | 37  | 1                 | Broca's               | Severe              | L                                                                                      | 6.95         | 49.1 |
| 21 | 55 | M | 14.5 | 4   | 1                 | Broca's               | Moderate            | L MCA infarct                                                                          | 6.25         | 54.9 |
| 22 | 62 | M | 20.5 | 105 | 1                 | Broca's               | Moderate            | L carotid artery occlusion                                                             | 8.5          | 69.8 |
| 23 | 52 | F | 16   | 72  | 1                 | Anomic                | Mild                | L                                                                                      | 8.9          | 76   |
| 24 | 65 | F | 18   | 140 | 1                 | Anomic                | Mild                | L insular region; L frontal,<br>parietal, extending into<br>basal ganglia              | 10           | 89.4 |
| 25 | 62 | F | 16   | 98  | 1                 | Conduction/<br>Anomic | Mild                | L MCA (following knee<br>surgery); L frontal,<br>temporal, parietal, insular<br>cortex | 9.5          | 90   |
| 26 | 27 | M | 18   | 49  | 1                 | Anomic                | Mild                | L                                                                                      | 9.95         | 81.1 |
| 27 | 82 | M | 16   | 21  | 1                 | Anomic                | Mild                | L                                                                                      | 9.9          | 96   |
| 28 | 58 | F | 12   | 36  | 1                 | Anomic                | Mild                | —                                                                                      | 8.8          | 77   |
| 29 | 24 | M | 14   | 52  | 1                 | Anomic                | Mild                | R aneurysm                                                                             | 8.7          | 78   |
| 30 | 66 | F | 12   | 62  | 1                 | Conduction            | Moderate            | L MCA, ischemic infarct; L<br>frontoparietal                                           | 8.95         | 70.9 |
| 31 | 34 | F | 21   | 70  | 1                 | Anomic                | Mild                | L MCA infarct                                                                          | 9.6          | 90.2 |
| 32 | 61 | F | 20.5 | 40  | 1                 | Anomic                | Moderate            | Thalamic CVA (following<br>brain tumor removal)                                        | 7.9          | 69   |
| 33 | 73 | M | 16   | 144 | 1                 | Anomic                | Mild                | —                                                                                      | 10           | 94.8 |
| 34 | 54 | F | 19   | 129 | 1                 | Anomic                | Mild                | L                                                                                      | 8.8          | 90.4 |
| 35 | 73 | M | 23   | 39  | 1                 | Conduction            | Moderate            | L temporal                                                                             | 7.95         | 62.5 |
| 36 | 71 | M | 12   | 66  | 1                 | Conduction            | Severe              | L temporoparietal infarct                                                              | 7.8          | 31   |
| 37 | 58 | F | 19   | 43  | 1                 | Broca's               | Severe              | L                                                                                      | 5.2          | 45   |
| 38 | 71 | M | 12   | 228 | 2                 | Broca's               | Severe              | L MCA infarct                                                                          | 4.2          | 10.8 |

| #  | A  | G | Ed. | MPO | Number<br>of CVAs | Aphasia<br>type | Aphasia<br>severity | Neuroimaging information | WAB-R scores |      |
|----|----|---|-----|-----|-------------------|-----------------|---------------------|--------------------------|--------------|------|
|    |    |   |     |     |                   |                 |                     |                          | AC           | AQ   |
| 39 | 49 | F | 13  | 34  | 1                 | Conduction      | Mild                | L temporoparietal        | 6.9          | 83   |
| 40 | 59 | M | 14  | 66  | 1                 | Anomic          | Mild                | L frontal                | 8.6          | 89.2 |
| 41 | 51 | M | 12  | 163 | 1                 | Anomic          | Mild                | L                        | 8.6          | 85.2 |

*Note.* A = age (years); G = gender; Ed. = education (years); MPO = months post-onset; CVAs = cerebrovascular accidents; MCA = middle cerebral artery. Neuroimaging information: L = left hemisphere; R = right hemisphere. WAB-R = Western Aphasia Battery–Revised (Kertesz, 2007); subtests: AC = Auditory Verbal Comprehension score (max. = 10); AQ = Aphasia Quotient (max. = 100).

## Reference

Kertesz, A. (2007). *Western Aphasia Battery–Revised*. San Antonio, TX: The Psychological Corporation.
