# Supplementary material
Source: publisher figshare collection journal article supplement (https://asha.figshare.com/articles/dataset/_/14963616)
Supplement: Supplementary file 4 [file 1]

**Supplemental Table 2.** (A) Verbal stimuli selection data.

| Concept          | Familiarity | Frequency | Age of acquisition | Naming latency (ms) | # of syllables | # of phonemes |
|------------------|-------------|-----------|--------------------|---------------------|----------------|---------------|
| <b>Accordion</b> | <b>2.15</b> | <b>1</b>  | <b>6.24</b>        | <b>1412</b>         | 4              | 8             |
| Airplane         | 3.78        | 11        | 3.49               | 722                 | 2              | 6             |
| <b>Alligator</b> | <b>1.65</b> | 4         | <b>4.86</b>        | 888                 | 4              | 7             |
| Anchor           | <b>1.6</b>  | 15        | —                  | —                   | 2              | 4             |
| Ant              | 2.62        | 6         | 2.74               | 1145                | 1              | 3             |
| Apple            | 3.98        | 9         | 2.55               | 745                 | 2              | 3             |
| <i>Arm</i>       | 4.75        | 94        | 2.25               | 826                 | 1              | 3             |
| Arrow            | 3.38        | 14        | 4.36               | 811                 | 2              | 4             |
| <b>Artichoke</b> | <b>2.29</b> | <b>0</b>  | <b>6.28</b>        | <b>1426</b>         | 3              | 7             |
| <b>Ashtray</b>   | 3.56        | <b>0</b>  | <b>4.95</b>        | <b>1250</b>         | 2              | 6             |
| <b>Asparagus</b> | 2.68        | <b>1</b>  | <b>6.03</b>        | <b>1282</b>         | 4              | 9             |
| <b>Axe</b>       | <b>2.28</b> | 12        | <b>4.97</b>        | 959                 | 1              | 3             |
| Baby carriage    | 2.72        | —         | 4.1                | 1030                | 4              | 9             |
| Ball             | 3.2         | 110       | 2.03               | 785                 | 1              | 3             |
| Balloon          | 2.58        | 10        | 2.38               | 766                 | 2              | 5             |
| <i>Banana</i>    | 3.65        | 4         | 2.76               | 683                 | 3              | 6             |
| Barn             | 2.38        | 29        | 4.15               | 979                 | 1              | 4             |
| <b>Barrel</b>    | <b>2.02</b> | 24        | <b>5.37</b>        | 953                 | 2              | 4             |
| Baseball bat     | 3.68        | —         | 3.78               | 764                 | 3              | 9             |
| Basket           | <b>2.18</b> | 17        | 4.16               | 752                 | 2              | 6             |
| Bear             | <b>1.98</b> | 57        | 3.65               | 1044                | 1              | 3             |
| <i>Bed</i>       | 4.72        | 127       | 2.42               | 645                 | 1              | 3             |
| Bee              | 2.68        | 11        | 3.53               | <b>1087</b>         | 1              | 2             |
| <b>Beetle</b>    | <b>1.88</b> | <b>0</b>  | <b>5.32</b>        | <b>1461</b>         | 2              | 4             |
| Bell             | 2.2         | 18        | 3.6                | 654                 | 1              | 3             |
| Belt             | 4.12        | 29        | 3.95               | 772                 | 1              | 4             |
| Bicycle          | 3.78        | 5         | 3.74               | 648                 | 3              | 6             |
| Bird             | 3.62        | 31        | 2.87               | 895                 | 1              | 4             |
| <b>Blouse</b>    | 4.18        | <b>1</b>  | <b>4.87</b>        | 1025                | 1              | 4             |
| <i>Book</i>      | 4.75        | 193       | 2.79               | 652                 | 1              | 3             |
| Boot             | 3.38        | 13        | 3.75               | 733                 | 1              | 3             |
| Bottle           | 3.72        | 76        | 3.58               | 829                 | 2              | 4             |
| Bow              | <b>2.25</b> | 15        | 3.7                | 800                 | 1              | 3             |
| Bowl             | 4.18        | 23        | 2.89               | 767                 | 1              | 3             |
| Box              | 2.88        | 70        | 2.69               | 732                 | 1              | 4             |
| <i>Bread</i>     | 4.4         | 41        | 2.74               | 726                 | 1              | 4             |
| Broom            | 3.42        | 2         | 3.73               | 797                 | 1              | 4             |

| Concept            | Familiarity | Frequency | Age of acquisition | Naming latency (ms) | # of syllables | # of phonemes |
|--------------------|-------------|-----------|--------------------|---------------------|----------------|---------------|
| Brush              | 3.8         | 44        | 3.08               | 711                 | 1              | 4             |
| Bus                | 4.5         | 34        | 3.1                | 766                 | 1              | 3             |
| Butterfly          | 2.92        | 2         | 3.58               | 738                 | 3              | 7             |
| Button             | 3.85        | 10        | —                  | —                   | 2              | 4             |
| <i>Cake</i>        | 4.02        | 13        | 2.73               | 733                 | 1              | 3             |
| <b>Camel</b>       | <b>2.08</b> | <b>1</b>  | <b>4.89</b>        | 1061                | 2              | 4             |
| Candle             | 3.08        | 18        | 4.1                | 760                 | 2              | 5             |
| Cannon             | <b>1.52</b> | 7         | —                  | —                   | 2              | 5             |
| Cap                | 3.12        | 27        | 3.61               | 886                 | 1              | 3             |
| <i>Car</i>         | 4.7         | 274       | 2.73               | 669                 | 1              | 3             |
| Carrot             | 3.55        | <b>1</b>  | 3.16               | 737                 | 2              | 5             |
| Cat                | 4.22        | 23        | 2.5                | 727                 | 1              | 3             |
| <b>Caterpillar</b> | <b>1.72</b> | <b>1</b>  | 4.26               | <b>1095</b>         | 4              | 8             |
| <b>Celery</b>      | 3.4         | 4         | <b>5</b>           | <b>1251</b>         | 3              | 5             |
| Chain              | 2.82        | 50        | 4.73               | 870                 | 1              | 3             |
| <i>Chair</i>       | 4.58        | 66        | 2.92               | 629                 | 1              | 3             |
| Cherry             | 3.38        | 6         | 3.79               | <b>1100</b>         | 2              | 4             |
| Chicken            | 2.42        | 37        | 3.13               | 1051                | 2              | 4             |
| <b>Chisel</b>      | 2.46        | 4         | <b>7.03</b>        | <b>1296</b>         | 2              | 4             |
| Church             | 3.38        | 348       | 3.85               | 822                 | 1              | 3             |
| <b>Cigar</b>       | 2.35        | 10        | <b>5.82</b>        | <b>1110</b>         | 2              | 5             |
| Cigarette          | 3.65        | 25        | 4.78               | 923                 | 3              | 7             |
| Clock              | 4.38        | 20        | 3.47               | 739                 | 1              | 4             |
| <b>Clothespin</b>  | 2.8         | <b>0</b>  | <b>4.95</b>        | <b>1408</b>         | 2              | 7             |
| Cloud              | 3.82        | 28        | 3.13               | <b>1365</b>         | 1              | 4             |
| Clown              | 2.6         | 3         | 3.23               | 813                 | 1              | 4             |
| Coat               | 3.88        | 43        | 3.47               | 954                 | 1              | 3             |
| Comb               | 4.52        | 6         | 3.1                | 738                 | 1              | 3             |
| Corn               | 3.5         | 34        | 3.5                | 795                 | 1              | 4             |
| Couch              | 4.4         | 12        | 3.63               | 875                 | 1              | 3             |
| Cow                | 2.42        | 29        | 3.11               | 928                 | 1              | 2             |
| Crown              | <b>1.52</b> | 19        | 3.98               | 923                 | 1              | 4             |
| <i>Cup</i>         | 4.4         | 45        | 2.68               | 719                 | 1              | 3             |
| Deer               | <b>2.22</b> | 13        | 3.98               | 972                 | 1              | 3             |
| Desk               | 4.32        | 65        | 3.92               | 825                 | 1              | 4             |
| <i>Dog</i>         | 4.6         | 75        | 2.23               | 754                 | 1              | 3             |
| Doll               | 2.92        | 10        | 2.46               | 871                 | 1              | 3             |
| <b>Donkey</b>      | <b>1.88</b> | <b>1</b>  | 4.35               | 963                 | 2              | 5             |
| <i>Door</i>        | 4.68        | 312       | 2.55               | 670                 | 1              | 3             |

| Concept            | Familiarity | Frequency | Age of acquisition | Naming latency (ms) | # of syllables | # of phonemes |
|--------------------|-------------|-----------|--------------------|---------------------|----------------|---------------|
| Doorknob           | 4.25        | 3         | 3.85               | 1067                | 2              | 6             |
| Dress              | 3.62        | 67        | 3.32               | 842                 | 1              | 4             |
| <b>Dresser</b>     | 4.52        | <b>1</b>  | 4.55               | <b>1100</b>         | 2              | 5             |
| Drum               | 2.6         | 11        | 4.27               | 845                 | 1              | 4             |
| Duck               | 2.75        | 9         | 2.93               | 899                 | 1              | 3             |
| <b>Eagle</b>       | 2.42        | 5         | <b>5.08</b>        | <b>1122</b>         | 2              | 3             |
| <i>Ear</i>         | 4.5         | 29        | 2.13               | 687                 | 1              | 2             |
| Elephant           | 2.35        | 7         | 3.66               | 756                 | 3              | 6             |
| Envelope           | 4.12        | 21        | 4.43               | 714                 | 3              | 7             |
| <i>Eye</i>         | 4.88        | 122       | 2.13               | 637                 | 1              | 2             |
| Fence              | 3.02        | 30        | 3.73               | 759                 | 1              | 4             |
| <i>Finger</i>      | 4.78        | 40        | 2.1                | 778                 | 2              | 5             |
| <i>Fish</i>        | 3.28        | 35        | 2.84               | 670                 | 1              | 3             |
| Flag               | 2.9         | 16        | 3.72               | 784                 | 1              | 4             |
| Flower             | 3.88        | 23        | 2.68               | 708                 | 2              | 4             |
| <b>Flute</b>       | 2.45        | <b>1</b>  | <b>5.45</b>        | <b>1465</b>         | 1              | 4             |
| Fly                | 3.02        | 33        | 3.63               | 861                 | 1              | 3             |
| <i>Foot</i>        | 4.78        | 70        | 2.08               | 702                 | 1              | 3             |
| Football           | 3.55        | 36        | 4.55               | 798                 | 2              | 6             |
| Football helmet    | 3.15        | —         | —                  | —                   | 4              | 12            |
| Fork               | 4.78        | 14        | 3.03               | 703                 | 1              | 4             |
| Fox                | <b>1.95</b> | 13        | 4                  | 953                 | 1              | 4             |
| <b>French horn</b> | <b>2</b>    | —         | <b>7.13</b>        | <b>1263</b>         | 2              | 9             |
| Frog               | 2.48        | <b>1</b>  | 3.48               | 768                 | 1              | 4             |
| Frying pan         | 4.15        | —         | 3.32               | 850                 | 3              | 8             |
| Garbage can        | 4.08        | —         | 3.7                | 816                 | 3              | 9             |
| <b>Giraffe</b>     | <b>1.8</b>  | <b>0</b>  | 4.21               | 733                 | 2              | 4             |
| <i>Glass</i>       | 4.78        | 99        | 2.9                | 768                 | 1              | 4             |
| Glasses            | 4           | 29        | 3.76               | 712                 | 2              | 6             |
| Glove              | 3.38        | 9         | 3.33               | 796                 | 1              | 4             |
| <b>Goat</b>        | <b>1.92</b> | 6         | 4.5                | <b>1325</b>         | 1              | 3             |
| <b>Gorilla</b>     | <b>2.05</b> | <b>0</b>  | 4.5                | 879                 | 3              | 6             |
| Grapes             | 3.65        | 7         | 3.5                | 760                 | 1              | 5             |
| <b>Grasshopper</b> | 2.42        | <b>0</b>  | 4.28               | <b>1233</b>         | 3              | 8             |
| Guitar             | 3.58        | 19        | 4.32               | 832                 | 2              | 5             |
| Gun                | 2.68        | 118       | 4.05               | 708                 | 1              | 3             |
| <i>Hair</i>        | 4.59        | 148       | 2.13               | 1058                | 1              | 3             |
| Hammer             | 3.48        | 9         | 4.46               | 743                 | 2              | 4             |
| <i>Hand</i>        | 4.82        | 431       | 2.24               | 655                 | 1              | 4             |

| Concept           | Familiarity | Frequency | Age of acquisition | Naming latency (ms) | # of syllables | # of phonemes |
|-------------------|-------------|-----------|--------------------|---------------------|----------------|---------------|
| Hanger            | 4.52        | 0         | 3.95               | 776                 | 2              | 4             |
| <b>Harp</b>       | <b>1.88</b> | <b>1</b>  | <b>6.08</b>        | 1004                | 1              | 4             |
| <i>Hat</i>        | 3.18        | 56        | 2.9                | 664                 | 1              | 3             |
| <i>Heart</i>      | 3.72        | 173       | 3.32               | 678                 | 1              | 4             |
| <b>Helicopter</b> | 2.55        | <b>1</b>  | <b>4.93</b>        | 775                 | 4              | 9             |
| Horse             | 3.55        | 117       | 3.53               | 802                 | 1              | 4             |
| <i>House</i>      | 4.38        | 591       | 2.41               | 730                 | 1              | 3             |
| Iron              | 3.65        | 43        | 4.76               | 786                 | 2              | 4             |
| Ironing board     | 3.5         | —         | <b>5.08</b>        | 1047                | 4              | 11            |
| Jacket            | 4           | 33        | 3.42               | 813                 | 2              | 5             |
| <b>Kangaroo</b>   | <b>1.92</b> | <b>0</b>  | 4.3                | 909                 | 3              | 7             |
| Kettle            | 3.8         | 3         | <b>5.35</b>        | 962                 | 2              | 4             |
| Key               | 4.85        | 88        | 3.5                | 765                 | 1              | 2             |
| Kite              | 2.48        | <b>1</b>  | 3.74               | 748                 | 1              | 3             |
| Knife             | 4.45        | 76        | 3.18               | 812                 | 1              | 3             |
| Ladder            | 3.35        | 19        | 4.5                | 785                 | 2              | 4             |
| Lamp              | 4.2         | 18        | 3.75               | 785                 | 1              | 4             |
| <i>Leaf</i>       | 4.3         | 12        | 2.75               | 729                 | 1              | 3             |
| <i>Leg</i>        | 4.65        | 58        | 2.2                | 853                 | 1              | 3             |
| Lemon             | 3.25        | 18        | 3.6                | 918                 | 2              | 5             |
| <b>Leopard</b>    | <b>1.92</b> | <b>0</b>  | <b>4.95</b>        | 1051                | 2              | 5             |
| Lettuce           | 3.42        | <b>0</b>  | 4.24               | 959                 | 2              | 5             |
| Light bulb        | 4.18        | —         | 4                  | 771                 | 2              | 7             |
| Light switch      | 4.58        | —         | 3.87               | 987                 | 2              | 7             |
| Lion              | <b>2</b>    | 17        | 3.75               | 916                 | 2              | 4             |
| <i>Lips</i>       | 4.5         | 69        | 2.55               | 672                 | 1              | 4             |
| <b>Lobster</b>    | 2.58        | <b>1</b>  | <b>5.3</b>         | 992                 | 2              | 6             |
| Lock              | 3.18        | 23        | <b>4.89</b>        | 918                 | 1              | 3             |
| Mitten            | 3.1         | <b>0</b>  | 3.35               | 838                 | 2              | 5             |
| Monkey            | 2.58        | 9         | 3.84               | 811                 | 2              | 5             |
| Moon              | 3.98        | 60        | 2.95               | 954                 | 1              | 3             |
| <b>Motorcycle</b> | 3.25        | <b>0</b>  | <b>4.89</b>        | 766                 | 4              | 8             |
| Mountain          | 2.7         | 33        | 4.25               | 761                 | 2              | 6             |
| Mouse             | 2.45        | 10        | 3.35               | 790                 | 1              | 3             |
| Mushroom          | 2.88        | 2         | 4.45               | 787                 | 2              | 6             |
| Nail              | 3.28        | 6         | 4.34               | 793                 | 1              | 3             |
| <b>Nail file</b>  | 3.15        | —         | <b>5.6</b>         | <b>1217</b>         | 2              | 6             |
| Necklace          | 2.7         | 3         | 3.95               | 850                 | 2              | 6             |
| Needle            | 3.4         | 15        | 4.28               | 1023                | 2              | 4             |

| Concept             | Familiarity | Frequency | Age of acquisition | Naming latency (ms) | # of syllables | # of phonemes |
|---------------------|-------------|-----------|--------------------|---------------------|----------------|---------------|
| <i>Nose</i>         | 4.52        | 60        | 2.38               | 728                 | 1              | 3             |
| <b>Nut</b>          | 2.55        | 15        | <b>5.5</b>         | <b>1171</b>         | 1              | 3             |
| Onion               | 3.32        | 15        | 4.08               | 1058                | 2              | 5             |
| Orange              | 3.34        | 23        | 3.23               | 853                 | 2              | 5             |
| <b>Ostrich</b>      | <b>1.52</b> | <b>0</b>  | <b>5.55</b>        | <b>1235</b>         | 2              | 6             |
| Owl                 | <b>2.22</b> | 2         | 4.08               | 812                 | 1              | 3             |
| <b>Paintbrush</b>   | 2.78        | <b>1</b>  | 4.21               | <b>1205</b>         | 2              | 8             |
| <i>Pants</i>        | 4.55        | 9         | 2.83               | 700                 | 1              | 5             |
| Peach               | 2.9         | 3         | 3.74               | <b>1419</b>         | 1              | 3             |
| <b>Peacock</b>      | <b>2.05</b> | 2         | <b>4.9</b>         | 1065                | 2              | 5             |
| Peanut              | 3           | 6         | 3.55               | 823                 | 2              | 5             |
| Pear                | 3.55        | 6         | 3.68               | 779                 | 1              | 3             |
| Pen                 | 4.78        | 18        | 3.35               | 764                 | 1              | 3             |
| <i>Pencil</i>       | 4.42        | 34        | 3.28               | 656                 | 2              | 5             |
| <b>Penguin</b>      | <b>1.7</b>  | <b>0</b>  | 4.74               | 1001                | 2              | 7             |
| Pepper              | 2.92        | 13        | 4.78               | <b>1359</b>         | 2              | 4             |
| Piano               | 3.42        | 38        | 4.28               | 770                 | 2              | 5             |
| Pig                 | <b>2.18</b> | 8         | 3.15               | 891                 | 1              | 3             |
| Pineapple           | 2.95        | 9         | 2.89               | 902                 | 3              | 6             |
| Pipe                | 2.9         | 20        | 4.53               | 817                 | 1              | 3             |
| <b>Pitcher</b>      | 3.5         | 21        | <b>4.82</b>        | <b>1324</b>         | 2              | 4             |
| <b>Pliers</b>       | 3.38        | <b>1</b>  | <b>5.64</b>        | <b>1160</b>         | 2              | 5             |
| Plug                | 4.18        | 23        | 4.55               | 1064                | 1              | 4             |
| Pocketbook          | 3.95        | 3         | 4.79               | 914                 | 3              | 8             |
| Pot                 | 4.22        | 28        | 3.47               | 830                 | 1              | 3             |
| Potato              | 3.46        | 15        | 3.64               | 828                 | 3              | 6             |
| Pumpkin             | 3.08        | 2         | 4                  | 947                 | 2              | 7             |
| Rabbit              | 2.95        | 11        | 2.8                | 724                 | 2              | 5             |
| <b>Raccoon</b>      | <b>2.2</b>  | <b>1</b>  | <b>5.21</b>        | <b>1246</b>         | 2              | 5             |
| Record player       | 4.4         | —         | 4.43               | <b>1239</b>         | 4              | 9             |
| Refrigerator        | 4.68        | 23        | 3.78               | 833                 | 5              | 10            |
| <b>Rhinoceros</b>   | <b>1.52</b> | 3         | <b>5.15</b>        | 961                 | 4              | 8             |
| Ring                | 3.48        | 47        | 3.74               | 831                 | 1              | 3             |
| Rocking chair       | 3.25        | —         | 4.28               | 769                 | 3              | 8             |
| <b>Roller skate</b> | <b>2.25</b> | —         | 4.61               | <b>1092</b>         | 3              | 8             |
| Rolling pin         | <b>2.22</b> | —         | 4.68               | 1082                | 3              | 8             |
| <b>Rooster</b>      | <b>2.22</b> | 3         | 4.16               | <b>1086</b>         | 2              | 5             |
| Ruler               | 3.58        | 3         | 4.3                | 738                 | 2              | 4             |
| Sailboat            | 2.92        | <b>1</b>  | 4.68               | 817                 | 2              | 6             |

| Concept            | Familiarity | Frequency | Age of acquisition | Naming latency (ms) | # of syllables | # of phonemes |
|--------------------|-------------|-----------|--------------------|---------------------|----------------|---------------|
| <b>Saltshaker</b>  | 4.18        | <b>0</b>  | <b>4.83</b>        | 805                 | 3              | 8             |
| Sandwich           | 4.45        | 10        | 3.13               | 851                 | 2              | 7             |
| Saw                | 2.92        | 352       | 4.4                | 839                 | 1              | 2             |
| Scissors           | 3.98        | <b>1</b>  | 3.79               | 696                 | 2              | 5             |
| Screw              | 3.2         | 21        | <b>4.93</b>        | 919                 | 1              | 4             |
| <b>Screwdriver</b> | 3.42        | <b>0</b>  | <b>5.24</b>        | 1035                | 3              | 9             |
| <b>Sea horse</b>   | <b>1.5</b>  | —         | <b>5.13</b>        | <b>1333</b>         | 2              | 6             |
| <b>Seal</b>        | <b>1.62</b> | 17        | <b>4.95</b>        | <b>1084</b>         | 1              | 3             |
| Sheep              | <b>1.85</b> | 23        | 3.6                | 1016                | 1              | 3             |
| Shirt              | 4.56        | 27        | 3                  | 881                 | 1              | 3             |
| <i>Shoe</i>        | 4.62        | 14        | 2.72               | 633                 | 1              | 2             |
| Skirt              | 3.64        | 21        | 3.84               | 1055                | 1              | 4             |
| <b>Skunk</b>       | <b>2.3</b>  | <b>0</b>  | 4.33               | 918                 | 1              | 5             |
| Sled               | 2.8         | <b>0</b>  | 4.68               | 966                 | 1              | 4             |
| <b>Snail</b>       | <b>1.85</b> | <b>1</b>  | 4.1                | 866                 | 1              | 4             |
| Snake              | <b>1.9</b>  | 44        | 3.92               | 747                 | 1              | 4             |
| Snowman            | 3.15        | <b>0</b>  | 3.18               | 770                 | 2              | 6             |
| <i>Sock</i>        | 4.52        | 4         | 2.44               | 680                 | 1              | 3             |
| Spider             | <b>2.28</b> | 2         | 3.38               | 1009                | 2              | 5             |
| Spinning wheel     | <b>1.18</b> | —         | —                  | —                   | 3              | 9             |
| Spool of thread    | 3.12        | —         | 4.68               | 968                 | 3              | 10            |
| <i>Spoon</i>       | 4.5         | 6         | 2.45               | 707                 | 1              | 4             |
| Squirrel           | 3.82        | <b>1</b>  | 3.89               | 908                 | 2              | 5             |
| <i>Star</i>        | 3.35        | 25        | 2.9                | 646                 | 1              | 4             |
| Stool              | 3.08        | 8         | 4.26               | 1038                | 1              | 4             |
| Stove              | 4.65        | 15        | 4.18               | 790                 | 1              | 4             |
| Strawberry         | 3.2         | <b>0</b>  | 3.68               | 875                 | 3              | 8             |
| Suitcase           | 3.65        | 20        | 4.45               | 945                 | 2              | 6             |
| <i>Sun</i>         | 4.9         | 112       | 2.34               | 649                 | 1              | 3             |
| Swan               | <b>1.97</b> | 3         | 4.3                | 913                 | 1              | 4             |
| Sweater            | 4.48        | 14        | 3.45               | 952                 | 2              | 5             |
| Swing              | 3.02        | 24        | 2.98               | 1055                | 1              | 4             |
| <i>Table</i>       | 4.35        | 198       | 2.58               | 718                 | 2              | 4             |
| <i>Telephone</i>   | 4.8         | 76        | 3.03               | 392                 | 3              | 7             |
| Television         | 4.82        | 50        | 3.08               | 771                 | 4              | 9             |
| Tennis racket      | 3.62        | —         | <b>5.3</b>         | 815                 | 4              | 10            |
| <b>Thimble</b>     | 2.48        | <b>1</b>  | <b>5.92</b>        | <b>1263</b>         | 2              | 5             |
| <i>Thumb</i>       | 4.72        | 10        | 2.38               | 835                 | 1              | 3             |
| Tie                | 3.8         | 23        | 4.42               | 761                 | 1              | 2             |

| Concept          | Familiarity | Frequency | Age of acquisition | Naming latency (ms) | # of syllables | # of phonemes |
|------------------|-------------|-----------|--------------------|---------------------|----------------|---------------|
| Tiger            | <b>2.1</b>  | 7         | 3.95               | 863                 | 2              | 4             |
| Toaster          | 4.08        | <b>0</b>  | 4.58               | 960                 | 2              | 5             |
| <i>Toe</i>       | 4.48        | 9         | 2.25               | 896                 | 1              | 2             |
| Tomato           | 3.78        | 4         | 3.47               | <b>1088</b>         | 3              | 6             |
| Toothbrush       | 4.62        | 6         | 3                  | 928                 | 2              | 7             |
| Top              | <b>1.88</b> | 204       | 3.95               | 1045                | 1              | 3             |
| Traffic light    | 4.55        | —         | —                  | —                   | 3              | 9             |
| Train            | 4.15        | 82        | 3.45               | 871                 | 1              | 4             |
| <i>Tree</i>      | 4.68        | 59        | 2.58               | 653                 | 1              | 3             |
| Truck            | 4.02        | 57        | 3.08               | 821                 | 1              | 4             |
| Trumpet          | 2.6         | 7         | <b>5.39</b>        | 879                 | 2              | 7             |
| Turtle           | 2.4         | 8         | —                  | —                   | 2              | 4             |
| Umbrella         | 3.95        | 8         | 3.8                | 688                 | 3              | 7             |
| Vase             | 2.78        | 4         | <b>4.87</b>        | 999                 | 1              | 3             |
| Vest             | 3.48        | 4         | <b>4.93</b>        | 855                 | 1              | 4             |
| Violin           | 2.68        | 11        | <b>5.5</b>         | 886                 | 3              | 6             |
| Wagon            | 2.5         | 55        | 3.18               | 940                 | 2              | 5             |
| Watch            | 4.58        | 81        | 4.27               | 783                 | 1              | 3             |
| Watering can     | 2.72        | —         | 4.74               | <b>1423</b>         | 4              | 9             |
| Watermelon       | 3.05        | <b>1</b>  | 4.08               | 1009                | 4              | 9             |
| Well             | <b>1.45</b> | 897       | —                  | —                   | 1              | 3             |
| Wheel            | <b>2.22</b> | 56        | 3.25               | 730                 | 1              | 3             |
| Whistle          | 2.45        | 4         | 4.68               | 822                 | 2              | 4             |
| <b>Windmill</b>  | <b>1.8</b>  | <b>1</b>  | —                  | —                   | 2              | 7             |
| Window           | 4.4         | 119       | 3                  | 791                 | 2              | 5             |
| <b>Wineglass</b> | 4.02        | <b>0</b>  | <b>5.79</b>        | 949                 | 2              | 7             |
| <b>Wrench</b>    | 2.72        | <b>0</b>  | <b>5.63</b>        | <b>1194</b>         | 1              | 4             |
| <b>Zebra</b>     | <b>1.6</b>  | <b>1</b>  | —                  | —                   | 2              | 5             |

*Note.* **Bold** = difficult; *italic* = easy.

(B) Descriptive statistics for verbal stimuli.

|              | Familiarity  | Frequency     | Age-of-Acquisition | RT             |
|--------------|--------------|---------------|--------------------|----------------|
| <i>M</i>     | 3.29         | 37.86         | 3.88224            | 893.232        |
| <i>SD</i>    | 0.956        | 88.09         | 0.9858             | 191.073        |
| +1 <i>SD</i> | <i>4.246</i> | <i>125.95</i> | <b>4.86805</b>     | <b>1084.31</b> |
| -1 <i>SD</i> | <b>2.334</b> | <b>0, 1</b>   | <i>2.89644</i>     | <i>702.247</i> |

*Note.* RT= reaction time; **bold** = difficult; *italic* = easy.
